# Supplementary material for: A Case Study of Delayed Action PIR Urinal-Controls in a University Setting and Their Impact Before, During, and After Covid-19
Source: Preprints.org preprint supplement (doi:10.20944/preprints202210.0345.v1), 2022-10-24
Supplement: Supplementary file 4 [file supplementary]

## Sheet: Headline sheet
	Difference per day (m3) during 'with PIR period'	Term Time Difference per day during 'With PIR period'(m3)	Holiday Difference per day during 'with PIR period'(m3)	Normal Closure Difference per day during 'with PIR peirod'(m3)	Difference per day During Lockdown(m3)	Difference during 'with PIR period' % Reduction	Term Time Difference during 'With PIR peirod' % reduction	Holiday Difference during 'with PIR period' % reduction	Normal Closure Difference during 'with PIR period'% Reduction	Difference During Lockdown % Reduction
With experimental Delay PIR	5.29419	5.57328	4.85567	5.47575	8.99801	46.8337	43.9828	53.0937	63.4679	82.2055
With exisiting grouped Delay action PIR on short delay*	-0.0383836	-0.0598364	-0.00798013	-0.267059	3.62574	-4.61781	-2.97415	-10.031	-18.04	61.0396
Building with Parital Coverage	4.77086	4.23174	5.71747	5.54	6.77568	61.1252	52.4065	77.9861	98.227	95.0161
Group Instant action PIR	1.23198	1.28823	1.09628	1.3	3.0507	19.7957	18.8428	20.9184	92.8571	73.3672
Individual Instant action PIR	-0.128315	-0.10271	-0.164603	1.29912	3.43449	-2.64897	-1.17345	-5.51803	42.1577	64.8286
Without PIR	0.158116	0.340958	-0.0997845	0.739755	2.71365	-13.7567	-18.6896	-6.23201	11.7297	46.9614
*These are operating on a different delay schedule to the experimental condition
	Term Time % Reduction Against Baseline pre-Covid-19	Holiday % Reduction Against Baseline pre-Covid-19	During Lockdowns % Reduction Against Baseline	Post-Covid-19 'New Normal'
With experimental grouped Delay PIR	43.9828	53.0937	82.2055	61.663
With exisiting grouped Delay action PIR on short delay*	-2.97415	-10.031	61.0396	53.53
Group Instant action PIR	18.8428	20.9184	73.3672	36.9875
Individual Instant action PIR	-1.17345	-5.51803	64.8286	59.56
Without PIR	-18.6896	-6.23201	46.9614	-1.9

## Sheet: With Delay action PIR
	Difference with PIR (m3)	Term Time Difference With PIR(m3)	Holiday Difference with PIR(m3)	Normal Closure Difference with PIR(m3)	Difference During Lockdown(m3)	Difference with PIR % Reduction	Term Time Difference With PIR % reduction	Holiday Difference with PIR % reduction	Normal Closure Difference with PIR% Reduction	Difference During Lockdown % Redction
Total per day	79.4129	83.5992	72.8351	82.1363	134.97
Average	5.29419	5.57328	4.85567	5.47575	8.99801	46.8337	43.9828	53.0937	63.4679	82.2055
AA	5.55469	4.90299	6.27049	6.4	13.635	32.0993	23.2073	47.486	71.1111	72.347
AP	8.47345	8.74558	8.0834	8.16471	13.598	60.488	58.6659	63.5487	82.2762	93.1413
DoK	13.7761	15.4624	11.3591	14.5294	22.5521	63.8512	65.2102	61.3564	76.7081	90.3667
LRC	4.22603	5.37842	2.57427	2.03529	11.2085	39.8575	39.5865	40.6917	39.3227	93.6043
MS	7.07496	7.3786	6.63973	7.21765	13.5279	39.3113	40.4807	37.582	66.5762	80.4918
SH	13.3958	12.9507	14.0296	12.6306	17.4276	70.1616	67.7026	73.7036	82.9643	95.8617
USSU	9.62104	10.3342	8.17709	13.9	17.6934	50.9359	50.5848	51.8568	77.45	91.6065
AB	1.21755	0.849735	1.86337	1.281	2.41176	38.5404	25.0156	67.9601	69.7712	86.6441
AD	0.696203	0.529801	0.988372	0.1	2.01471	30.7263	20.202	60.2837	100	83.5366
ATI	3.5127	3.95212	2.74116	4.716	5.0889	67.5191	70.7073	60.6015	92.4706	83.084
AX	0.177091	0.166687	0.221976	-0.006	0.604348	16.9161	15.2748	25.9491	-75	81.3817
LB	3.53005	5.01395	1.41722	4.52941	6.91241	52.623	58.4599	35.122	72.6415	95.56
NC	0.121941	0.0794702	0.196512	2.27374e-14	0.259459	29.9482	17.8571	57.6792	1.13687e-10	68.3274
PATS	7.59726	7.35029	7.95124	6.58824	7.63085	84.2601	80.3285	90.1034	95.7265	91.9116
VSP	0.437975	0.504294	0.32153	0.05	0.405147	25.2678	26.4588	22.481	100	25.2174

## Sheet: Partial Coverage
	Difference with PIR (m3)	Term Time Difference With PIR(m3)	Holiday Difference with PIR(m3)	Normal Closure Difference with PIR(m3)	Difference During Lockdown(m3)	Difference with PIR % Reduction	Term Time Difference With PIR % reduction	Holiday Difference with PIR % reduction	Normal Closure Difference with PIR% Reduction	Difference During Lockdown % Redction
BA	4.77086	4.23174	5.71747	5.54	6.77568	61.1252	52.4065	77.9861	98.227	95.0161		*3 out of 4 cisterns have PIR, 2 only 2 out of 3 are working.

## Sheet: Excluded
	Difference with PIR (m3)	Term Time Difference With PIR(m3)	Holiday Difference with PIR(m3)	Normal Closure Difference with PIR(m3)	Difference During Lockdown(m3)	Difference with PIR % Reduction	Term Time Difference With PIR % reduction	Holiday Difference with PIR % reduction	Normal Closure Difference with PIR% Reduction	Difference During Lockdown % Redction
AZ	-1.51474	-1.33572	-1.82907	-0.466	-0.559559	-255.821	-368.121	-183.89	-136.657	-243.676	This building had a particularly low normal use and was used for Covid19 research, resulting in a notable increase in water use during this time
TB											Metering data gap is too big
EFCS2											two conditions present so excluded

## Sheet: With group instant action PIR
	Difference with PIR (m3)	Term Time Difference With PIR(m3)	Holiday Difference with PIR(m3)	Normal Closure Difference with PIR(m3)	Difference During Lockdown(m3)	Difference with PIR % Reduction	Term Time Difference With PIR % reduction	Holiday Difference with PIR % reduction	Normal Closure Difference with PIR% Reduction	Difference During Lockdown % Redction
Total per day	4.92792	5.15292	4.38512	1.3	12.2028
Average	1.23198	1.28823	1.09628	1.3	3.0507	19.7957	18.8428	20.9184	92.8571	73.3672
EFCS1	0.835443	0.933775	0.662791	1.3	2.01351	28.6957	31.4031	23.6515	92.8571	69.6262
Hillside	4.30357	4.45	4.08824		7.48529	60.3003	53.2934	76.3736		93.1382
Starbucks and Oaks	-0.302973	-0.117714	-0.575413		1.63951	-13.9493	-5.29293	-27.4599		85.6623
HA (main)	0.091875	-0.113143	0.209508		1.06449	4.13599	-4.03259	11.1082		45.0422

## Sheet: With Individual instant action 
	Year on year Difference (m3)	Term Time Difference With PIR(m3)	Holiday Difference with PIR(m3)	Normal Closure Difference with PIR(m3)	Difference During Lockdown(m3)	year to year Difference % Reduction	Term Time Difference % reduction	Holiday Difference % reduction	Normal Closure Difference with % Reduction	Difference During Lockdown % Redction
Total per day	-0.25663	-0.205421	-0.329205	2.59824	6.86897
Average	-0.128315	-0.10271	-0.164603	1.29912	3.43449	-2.64897	-1.17345	-5.51803	42.1577	64.8286
MPRC	-0.270329	-0.411028	-0.0709272	0.892353	2.33956	-5.6324	-6.59811	-2.5578	35.982	40.3818
BBBC Toilet Core	0.0136986	0.205607	-0.258278	1.70588	4.52941	0.334448	4.25121	-8.47826	48.3333	89.2754

## Sheet: Already Had Delayed action PIR
	Year on year Difference (m3)	Term Time Difference With PIR(m3)	Holiday Difference with PIR(m3)	Normal Closure Difference with PIR(m3)	Difference During Lockdown(m3)	year to year Difference % Reduction	Term Time Difference % reduction	Holiday Difference % reduction	Normal Closure Difference with % Reduction	Difference During Lockdown % Redction
Total per day	-0.0767671	-0.119673	-0.0159603	-0.534118	7.25147
Average	-0.0383836	-0.0598364	-0.00798013	-0.267059	3.62574	-4.61781	-2.97415	-10.031	-18.04	61.0396
IFH	-0.617315	-0.430421	-0.882185	-0.692941	1.24926	-20.6475	-10.8793	-54.4559	-44.5706	33.821
VSM	0.540548	0.310748	0.866225	0.158824	6.00221	11.4119	4.93104	34.3939	8.49057	88.2582

## Sheet: Without PIR
	Year on year Difference (m3)	Term Time Difference With PIR(m3)	Holiday Difference with PIR(m3)	Normal Closure Difference with PIR(m3)	Difference During Lockdown(m3)	year to year Difference % Reduction	Term Time Difference % reduction	Holiday Difference % reduction	Normal Closure Difference with % Reduction	Difference During Lockdown % Redction
Total per day	1.8974	4.09149	-1.19741	8.87706	32.5638
Average	0.158116	0.340958	-0.0997845	0.739755	2.71365	-13.7567	-18.6896	-6.23201	11.7297	46.9614
5G	0.983644	1.11023	0.804238	1.12706	3.25324	22.4942	24.6131	19.2517	31.5547	72.753
AC	4.68099	5.60521	3.38586	4.81353	10.0173	56.0827	54.1665	61.0969	55.7349	77.5729
AW*	0.109945	0.170667	0.0238889	0.0417647	0.317647	12.6889	18.2268	3.11289	8.26542	33.8585
AY*	-2.05636	-2.14473	-1.93111	-0.649412	0.148382	-54.4965	-55.1272	-53.5326	-27.6	3.93856
BC*	0.0136986	0.205607	-0.258278	1.70588	4.52941	0.334448	4.25121	-8.47826	48.3333	89.2754
CRC	-0.0116438	0.00271028	-0.0319868	-0.247059	0.598978	-0.894831	0.211024	-2.41379	-47.2441	52.6166
GSA*	2.14849	2.65748	1.42715	0.123529	6.39706	36.2016	34.2467	42.6226	16.0305	90.446
IVY	0.160192	0.240514	0.0463576	0.0170588	1.24225	14.9414	16.0283	9.97009	21.4815	91.4874
PGMS	-0.319452	1.36168	-2.70199	3.10412	5.59716	-6.74944	24.4681	-76.0329	59.1924	93.1657
PM	-0.563918	-0.816822	-0.205497	-0.00352941	0.0473529	-73.2465	-99.5388	-29.4402	-1.13852	5.99349
VSC*	-1.49751	-2.44794	-0.15053	-0.0382353	-0.582206	-150.576	-224.833	-17.4846	-4.0625	-59.5338	maybe exclude?
Wates	-1.75068	-1.85311	-1.60552	-1.11765	0.997214	-21.8611	-20.9887	-23.456	-19.7917	11.9635
*No Urinals in building
